# Supplementary material for: Hands as Sex Cues: Sensitivity Measures, Male Bias Measures, and Implications for Sex Perception Mechanisms
Source: PLoS One. 2014 Mar 6;9(3):e91032. doi: 10.1371/journal.pone.0091032 (PMC3946328; doi:10.1371/journal.pone.0091032)
Supplement: Dataset S1 — Sex classification error rates and summary of analyses (Experiment 1). (XLSX) [file pone.0091032.s001.xlsx]

## Sheet: Worksheet S1
	Dataset S1. Sex classification error rates and summary of analyses (Experiment 1).
	© Copyright 2014 Gaetano, van der Zwan, Blair, and Brooks.
				Mean Proportion Sex Classification Errors
				125ms Presentation Duration				1000 ms Presentation Duration
				Colour Images		Silhouette Images		Colour Images		Silhouette Images
				Female Hands	Male Hands	Female Hands	Male Hands	Female Hands	Male Hands	Female Hands	Male Hands
		Female Observers	1	0.464559	0.197126	0.592707	0.272817	0.285345	0.247024	0.666667	0.0916667
			2	0.36954	0.366667	0.475	0.225	0.5	0.233333	0.5	0.133333
			3	0.278448	0.289368	0.708333	0.146921	0.190066	0.337438	0.553469	0.415996
			4	0.18477	0.628161	0.780747	0.0925287	0.287356	0.455172	0.779762	0.0594828
			5	0.370402	0.471654	0.611207	0.384524	0.145402	0.504319	0.611453	0.313506
			6	0.258333	0.389655	0.662356	0.25	0.418391	0.226724	0.783333	0.0847701
		Male Observers	7	0.466233	0.33869	0.476149	0.420567	0.453129	0.277771	0.448595	0.420115
			8	0.666667	0.134195	1	0	0.513095	0.148481	0.924286	0.0364721
			9	0.341667	0.379885	0.443199	0.367672	0.218678	0.283929	0.57931	0.274405
			10	0.399282	0.553161	0.445402	0.654598	0.211494	0.526437	0.335057	0.697024
			11	0.420587	0.177586	0.649323	0.0933908	0.312685	0.260979	0.479124	0.257407
		Group Statistics	Mean	0.383681	0.356923	0.62222	0.264365	0.321422	0.318328	0.605551	0.253107
			Standard Deviation	0.127881	0.15464	0.168797	0.186027	0.129921	0.123555	0.171943	0.202182
			Standard Error	0.0385576	0.0466258	0.0508943	0.0560892	0.0391726	0.0372532	0.0518429	0.06096
				Contrast Coefficients
				125ms Presentation Duration				1000 ms Presentation Duration
				Colour Images		Silhouette Images		Colour Images		Silhouette Images
				Female Hands	Male Hands	Female Hands	Male Hands	Female Hands	Male Hands	Female Hands	Male Hands
	Planned Orthogonal Contrast	125ms vs. 1000ms Presentation Duration		1	1	1	1	-1	-1	-1	-1
		Colour vs. Silhouette Images		1	1	-1	-1	1	1	-1	-1
		Colour Female vs. Silhouette Male Hands		1	-1	0.476149	0.420567	1	-1	0.448595	0.420115
		Silhouette Female vs. Silhouette Male hands		0.278448	0.289368	0.708333	-1	0.190066	0.337438	1	-1
				Contrast Condition Means
				125ms Presentation Duration	1000ms Presentation Duration	Colour Images	Silhouette Images	Colour Images		Silhouette Images
								Female Hands	Male Hands	Female Hands	Male Hands
		Female Observers	1	0.381802	0.322675	0.298514	0.405964	0.374952	0.222075	0.629687	0.182242
			2	0.359052	0.341667	0.367385	0.333333	0.43477	0.3	0.4875	0.179167
			3	0.355768	0.374242	0.27383	0.45618	0.234257	0.313403	0.630901	0.281458
			4	0.421552	0.395443	0.388865	0.42813	0.236063	0.541667	0.780255	0.0760057
			5	0.459447	0.39367	0.372945	0.480172	0.257902	0.487987	0.61133	0.349015
			6	0.390086	0.378305	0.323276	0.445115	0.338362	0.30819	0.722845	0.167385
		Male Observers	7	0.42541	0.399903	0.383956	0.441357	0.459681	0.308231	0.462372	0.420341
			8	0.450216	0.405584	0.36561	0.490189	0.589881	0.141338	0.962143	0.0182361
			9	0.383106	0.33908	0.30604	0.416147	0.280172	0.331907	0.511255	0.321039
			10	0.513111	0.442503	0.422593	0.53302	0.305388	0.539799	0.39023	0.675811
			11	0.335222	0.327549	0.292959	0.369811	0.366636	0.219283	0.564223	0.175399
		Group Statistics	Mean	0.406797	0.374602	0.345088	0.436311	0.352551	0.337625	0.613885	0.258736
			Standard Deviation	0.052911	0.0377879	0.0480555	0.0557658	0.109292	0.132199	0.162275	0.182022
			Standard Error	0.0159533	0.0113935	0.0144893	0.016814	0.0329529	0.0398596	0.0489276	0.0548816
				Analysis of Variance Summary
				SS	df	MS	F	p	ηp2
	125ms vs. 1000ms Presentation Duration		Effect	0.023	1	0.023	16.496	0.00187832	0.621622
			Error	0.014	10	0.001
	Colour vs. Silhouette Images		Effect	0.181	1	0.181	29.308	0.000212201	0.744856
			Error	0.062	10	0.006
	Colour Female vs. Silhouette Male Hands		Effect	0.002	1	0.002	0.047	0.832337	0.00401606
			Error	0.496	10	0.05
	Silhouette Female vs. Silhouette Male hands		Effect	1.393	1	1.393	13.248	0.00388957	0.569734
			Error	1.052	10	0.105
