# Supplementary material for: Hands as Sex Cues: Sensitivity Measures, Male Bias Measures, and Implications for Sex Perception Mechanisms
Source: PLoS One. 2014 Mar 6;9(3):e91032. doi: 10.1371/journal.pone.0091032 (PMC3946328; doi:10.1371/journal.pone.0091032)
Supplement: Dataset S2 — Sex classification sensitivity and bias scores and summary of analyses (Experiment 2). The dataset contains two worksheets: Click the ‘Worksheet A’ tab to view a summary of the sensitivity data, and click the ‘Worksheet B’ tab to view a summary of the bias data. (XLSX) [file pone.0091032.s002.xlsx]

## Sheet: Worksheet A
	Dataset S2. Sex classification sensitivity and bias scores and summary of analyses (Experiment 2).
	The dataset contains two worksheets: Click the ‘Worksheet A’ tab to view a summary of the sensitivity data, and click the ‘Worksheet B’ tab to view a summary of the bias data.
	© Copyright 2014 Gaetano, van der Zwan, Blair, and Brooks.
				Mean Standardised Sensitivity Scores (d¢)
				125ms Presentation Duration				1000 ms Presentation Duration
				Colour Images		Silhouette Images		Colour Images		Silhouette Images
				Female Target	Male Target	Female Target	Male Target	Female Target	Male Target	Female Target	Male Target
		Female Observers	1	0.704789	0.849523	0.819201	0.733217	1.40692	1.43956	0.636174	1.1507
			2	0.622926	0.914164	0.807697	0.900773	1.38803	1.21179	1.21724	0.691484
			3	1.15599	0.971922	0.757758	1.00657	1.65666	1.22954	0.326332	0.87816
			4	0	0.0417057	0.795972	0.951696	0.747171	1.1202	0.318422	0.51356
			5	0.732273	0.701594	0.691304	-0.173538	1.17135	1.31617	0.903874	-0.939249
			6	0.978211	0.86453	0.610478	0.605494	1.3192	1.22954	0.314795	0.269637
		Male Observers	7	0.790876	0.806656	-0.53321	0.378274	1.64588	0.151988	-0.262228	0.45269
			8	0.551189	0.163965	0	0.166414	0.828373	0.925982	-0.177231	0.329732
			9	0.788653	1.65915	0.441979	1.21844	0.976196	0.900773	1.08627	1.07597
			10	-0.336349	-0.429665	0.198038	0.159453	1.28852	0.353289	-0.319365	-0.505747
			11	0.63862	1.05537	1.75115	1.34424	1.14975	1.67319	0.774099	0.691755
		Group Statistics	Mean	0.602471	0.69081	0.576397	0.662822	1.23437	1.05018	0.438034	0.418972
			Standard Deviation	0.423527	0.567694	0.575557	0.481642	0.298524	0.451222	0.53676	0.637716
			Standard Error	0.127698	0.171166	0.173537	0.14522	0.0900084	0.136049	0.161839	0.192278
				125ms Presentation Duration				1000 ms Presentation Duration
				Colour Images		Silhouette Images		Colour Images		Silhouette Images
				Target Averaged (Female, Male)		Target Averaged (Female, Male)		Target Averaged (Female, Male)		Target Averaged (Female, Male)
		Female Observers	1	0.704789		0.819201		1.40692		0.636174
			2	0.622926		0.807697		1.38803		1.21724
			3	1.15599		0.757758		1.65666		0.326332
			4	0		0.795972		0.747171		0.318422
			5	0.732273		0.691304		1.17135		0.903874
			6	0.978211		0.610478		1.3192		0.314795
		Male Observers	7	0.790876		-0.53321		1.64588		-0.262228
			8	0.551189		0		0.828373		-0.177231
			9	0.788653		0.441979		0.976196		1.08627
			10	-0.336349		0.198038		1.28852		-0.319365
			11	0.63862		1.75115		1.14975		0.774099
		Group Statistics	Mean	0.602471		0.576397		1.23437		0.438034
			Standard Deviation	0.423527		0.575557		0.298524		0.53676
			Standard Error	0.127698		0.173537		0.0900084		0.161839
				Contrast Coefficients
				125ms Presentation Duration				1000 ms Presentation Duration
				Colour Images		Silhouette Images		Colour Images		Silhouette Images
				Female Target	Male Target	Female Target	Male Target	Female Target	Male Target	Female Target	Male Target
	Planned Orthogonal Contrast	Silhouette Images, Female vs. Male Target		0	0	1	-1	0	0	1	-1
		Silhouette Images, 125ms vs. 1000ms Presentation Duration		0	0	1	1	0	0	-1	-1
		Silhouette Images, Target Sex × Presentation Duration		0	0	1	-1	0	0	-1	1
				Contrast Condition Means
				Silhouette Images		Silhouette Images
				Female Target	Male Target	125ms	1000ms
		Female Observers	1	0.727687	0.941957	0.776209	0.893435
			2	1.01247	0.796128	0.854235	0.954361
			3	0.542045	0.942365	0.882164	0.602246
			4	0.557197	0.732628	0.873834	0.415991
			5	0.797589	-0.556393	0.258883	-0.0176873
			6	0.462636	0.437566	0.607986	0.292216
		Male Observers	7	-0.397719	0.415482	-0.0774683	0.0952311
			8	-0.0886155	0.248073	0.0832072	0.0762506
			9	0.764123	1.14721	0.830211	1.08112
			10	-0.0606633	-0.173147	0.178745	-0.412556
			11	1.26263	1.018	1.5477	0.732927
		Group Statistics	Mean	0.507216	0.540897	0.619609	0.428503
			Standard Deviation	0.502688	0.533406	0.470861	0.469234
			Standard Error	0.151566	0.160828	0.14197	0.141479
				Analysis of Variance Summary
				SS	df	MS	F	p	ηp2
	Silhouette Images, Female vs. Male Target		Effect	0.012	1	0.012	0.04	0.845489	0.00385728
			Error	3.099	10	0.31
	Silhouette Images, 125ms vs. 1000ms Presentation Duration		Effect	0.402	1	0.402	3.369	0.096308	0.252038
			Error	1.193	10	0.119
	Silhouette Images, Target Sex × Presentation Duration		Effect	0.031	1	0.031	0.476	0.505935	0.0459941
			Error	0.643	10	0.064

## Sheet: Worksheet B
	Dataset S2. Sex classification sensitivity and bias scores and summary of analyses (Experiment 2).
	The dataset contains two worksheets: Click the ‘Worksheet A’ tab to view a summary of the sensitivity data, and click the ‘Worksheet B’ tab to view a summary of the bias data.
	© Copyright 2014 Gaetano, van der Zwan, Blair, and Brooks.
				Mean Standardised Criterion Scores (c)
				125ms Presentation Duration				1000 ms Presentation Duration
				Colour Images		Silhouette Images		Colour Images		Silhouette Images
				Female Target	Male Target	Female Target	Male Target	Female Target	Male Target	Female Target	Male Target
		Female Observers	1	0.818959	-0.551435	0.634479	-0.804745	-0.0672876	-0.0968521	0.318087	-0.417269
			2	0.311463	-0.251635	0.572348	-0.281887	0.477337	0.143256	0.697309	0.214356
			3	-0.328866	-0.359287	1.10428	-0.997801	-0.260841	-0.0672876	0.516455	-0.84909
			4	-0.547484	0.152685	0.12884	-0.391	0.317206	-0.121961	0.686037	-0.73203
			5	-0.971631	0.350797	-1.32185	0.0867689	-1.08182	0.792659	-1.04915	0.383454
			6	-0.147069	-0.0902278	0.0480496	-1.36475	0.306309	-0.0672876	0.684224	-0.366137
		Male Observers	7	0.228354	0.204496	0.441558	-0.0839226	-0.052191	0.437566	0.299613	0.21847
			8	0.384942	0.957114	1.83391	1.75071	0.208739	0.64778	1.39454	1.50263
			9	-0.337947	-0.398846	0.305837	-0.519215	-0.488098	0.0970977	0.273496	0.0900062
			10	-0.875457	-0.116421	0.537155	-0.645675	-1.02324	0.555629	0.707166	-0.176644
			11	0.444667	-0.339166	0.791924	-0.594282	0.0480496	-0.129312	0.345224	-0.314444
		Group Statistics	Mean	-0.0927335	-0.0401752	0.461504	-0.349619	-0.146895	0.199208	0.443001	-0.0406086
			Standard Deviation	0.576661	0.433451	0.770738	0.807016	0.52552	0.345192	0.588516	0.646812
			Standard Error	0.17387	0.13069	0.232386	0.243324	0.15845	0.104079	0.177444	0.195021
				125ms Presentation Duration				1000 ms Presentation Duration
				Colour Images		Silhouette Images		Colour Images		Silhouette Images
				Target Difference (Female - Male)		Target Difference (Female - Male)		Target Difference (Female - Male)		Target Difference (Female - Male)
		Female Observers	1	1.37039		1.43922		0.0295645		0.735356
			2	0.563098		0.854235		0.334081		0.482953
			3	0.0304213		2.10208		-0.193553		1.36554
			4	-0.700169		0.519841		0.439167		1.41807
			5	-1.32243		-1.40862		-1.87448		-1.4326
			6	-0.0568407		1.4128		0.373597		1.05036
		Male Observers	7	0.0238573		0.525481		-0.489757		0.0811431
			8	-0.572172		0.0832072		-0.439041		-0.10809
			9	0.0608995		0.825052		-0.585196		0.18349
			10	-0.759035		1.18283		-1.57887		0.883811
			11	0.783833		1.38621		0.177362		0.659668
		Group Statistics	Mean	-0.0525583		0.811122		-0.346103		0.483609
			Standard Deviation	0.770069		0.922908		0.773161		0.806275
			Standard Error	0.232185		0.278267		0.233117		0.243101
				Contrast Coefficients
				125ms Presentation Duration				1000 ms Presentation Duration
				Colour Images		Silhouette Images		Colour Images		Silhouette Images
				Female Target	Male Target	Female Target	Male Target	Female Target	Male Target	Female Target	Male Target
	Planned Orthogonal Contrast	Silhouette Images, Female vs. Male Target		0	0	1	-1	0	0	1	-1
		Silhouette Images, 125ms vs. 1000ms Presentation Duration		0	0	1	1	0	0	-1	-1
		Silhouette Images, Target Sex × Presentation Duration		0	0	1	-1	0	0	-1	1
				Contrast Condition Means
				Silhouette Images		Silhouette Images
				Female Hands	Male Hands	125ms	1000ms
	ab	Female Observers	1	0.476283	-0.611007	-0.0851328	-0.049591
	cm		2	0.634829	-0.0337655	0.14523	0.455833
	gh		3	0.810368	-0.923446	0.0532399	-0.166318
	hc		4	0.407439	-0.561515	-0.13108	-0.0229964
	mi		5	-1.1855	0.235111	-0.61754	-0.332848
	rg		6	0.366137	-0.865445	-0.658352	0.159044
	aj	Male Observers	7	0.370586	0.0672738	0.178818	0.259042
	bj		8	1.61423	1.62667	1.79231	1.44859
	dn		9	0.289667	-0.214604	-0.106689	0.181751
	nh		10	0.622161	-0.41116	-0.05426	0.265261
	vdz		11	0.568574	-0.454363	0.0988213	0.0153899
		Group Statistics	Mean	0.452252	-0.195114	0.0559425	0.201196
			Standard Deviation	0.654179	0.707119	0.640091	0.468869
			Standard Error	0.197242	0.213204	0.192995	0.141369
				Analysis of Variance Summary
				SS	df	MS	F	p	ηp2
	Silhouette Images, Female vs. Male Target		Effect	4.61	1	4.61	6.625	0.0277043	0.407965
			Error	6.69	10	0.696
	Silhouette Images, 125ms vs. 1000ms Presentation Duration		Effect	0.232	1	0.232	2.341	0.157006	0.189542
			Error	0.992	10	0.099
	Silhouette Images, Target Sex × Presentation Duration		Effect	0.295	1	0.295	5.369	0.0429838	0.349526
			Error	0.549	10	0.055
